## Device Therapy - Implantable Cardioverter Defibrillator (ICD)

## Five year outcomes of the subcutaneous implantable cardioverter-defibrillator EF-FORTLESS (evaluation of factors impacting clinical outcome and cost effectiveness of the S-ICD) registry

Lambiase P.<sup>1</sup>; Theuns DAMJ<sup>2</sup>; Murgatroyd FD.<sup>3</sup>; Barr CS.<sup>4</sup>; Eckardt L.<sup>5</sup>; Neuzil P.<sup>6</sup>; Scholten MF.<sup>2</sup>; Hood MA.<sup>7</sup>; Kuschyk J.<sup>8</sup>; Brisben A.<sup>9</sup>; Carter N.<sup>9</sup>; Knops RE.<sup>10</sup>; Boersma LVA<sup>11</sup>

<sup>1</sup>Barts Heart Centre, Cardiology, London, United Kingdom of Great Britain & Northern Ireland

<sup>2</sup>Erasmus University Medical Centre, Rotterdam, Netherlands (The)

<sup>3</sup>King's College Hospital, London, United Kingdom of Great Britain & Northern Ireland

<sup>4</sup>Russells Hall Hospital, Dudley, United Kingdom of Great Britain & Northern Ireland

<sup>5</sup>University of Muenster, Muenster, Germany

<sup>6</sup>Na Homolce Hospital, Cardiology, Prague, Czechia

<sup>7</sup>Auckland City Hospital, Auckland, New Zealand

<sup>8</sup>University Medical Centre of Mannheim, Mannheim, Germany

<sup>9</sup>Boston Scientific, St Paul, United States of America

<sup>10</sup>Academic Medical Center, Cardiology and Cardio-thoracic Surgery, Amsterdam, Netherlands (The)

<sup>11</sup>St Antonius Hospital, Nieuwegein, Netherlands (The)

**Funding Acknowledgements:** Type of funding sources: Private company. Main funding source(s): Boston Scientific

**OnBehalf:** EFFORTLESS Registry

**Introduction:** Patients (pts) implanted with transvenous (TV) implantable cardioverter-defibrillator (ICD) experience complications (Cx) associated with TV leads and inappropriate shocks (IAS) for atrial fibrillation (AF) or other supraventricular tachycardias (SVT). The EFFORTLESS S-ICD Registry is a 5-year (yr) follow-up (f/u) study of pts implanted with the subcutaneous ICD (S-ICD).

**Purpose:** To report on the 5-yr outcomes of pts with a wide range of S-ICD indications implanted with early generation devices.

**Methods:** Pts were enrolled at 43 centers February 2011-December 2014. Kaplan-Meier Cx, appropriate shock (AS), and IAS rates are reported.

**Results:** 994 pts (495 retrospective) were enrolled in the EFFORTLESS study and 984 pts (28% female, 48 ± 17 yrs, BMI 27 ± 6 kg/m<sup>2</sup>, ejection fraction 43 ± 18%) underwent S-ICD implantation. Mean study f/u was 4.4 ± 1.6 yrs. The pt cohort had diverse etiologies: 31% ischemic heart disease, 19% non-ischemic cardiomyopathy, 11% hypertrophic cardiomyopathy, 17% channelopathies, and 20% of pts miscellaneous. Total system- and procedure-related Cx (table) were 9.4% at 5 yrs. AS and IAS rates at 5 yrs were 15.9% and 16.9%, respectively and the IAS rates for AF/SVT and t wave oversensing were 3.1% and 5.8%, respectively. More pts experienced Cx and IAS in the first yr than in yrs 2-5 altogether (8.7 vs 8.2%), the most common as a result of discomfort/erosion (38%), IAS (26%), system infection (9%), and premature battery depletion (9%). Of these late Cx, 74% were experienced by retrospective pts. Spontaneous conversion efficacy for the first shock and final shocks was 89.7% and 97.7%. Of the 91 (9.2%) deaths reported, none were associated with the S-ICD system or procedure. Cause of death was cardiac for 40 pts, non-cardiac for 40 pts, other for 4 pts, and unknown for 7 pts. Only 20 (2.0%) pts had their S-ICD replaced for a TV device for pacing: 4 bradycardia, 7 anti-tachycardia, and 9 for biventricular pacing.

**Conclusions:** The EFFORTLESS registry provides 5-year follow-up for a diverse, large, multinational S-ICD registry. Complications primarily occurred in the first year but remained low through 5 years. Inappropriate shock rates were typically observed in older generation devices prior to introduction of the SMART Pass filter. Replacement for TV-ICD due to the need for pacing was rare.

| Outcome                      | 30 day | 1 yr | 2 yr | 3 yr | 4 yr | 5yr  | Annual |
|------------------------------|--------|------|------|------|------|------|--------|
| Complications (Kaplan-Meier) | 2.0    | 5.3  | 6.8  | 7.6  | 8.6  | 9.4  | 1.9    |
| IAS, overall (Kaplan-Meier)  | 1.7    | 8.7  | 11.6 | 13.1 | 14.6 | 16.9 | 3.4    |
| IAS, t wave oversensing      |        | 3.4  |      |      |      | 5.8  | 1.2    |
